# Supplementary material for: Radiation and Stemness Phenotype May Influence Individual Breast Cancer Outcomes: The Crucial Role of MMPs and Microenvironment
Source: PubMed Central journal article supplement (PMC6896076; doi:10.3390/cancers11111781), 2019-11-12
Supplement: cancers-11-01781-s001.pdf [file cancers-11-01781-s001.pdf]

## Supplementary Materials

# Radiation and Stemness Phenotype May Influence Individual Breast Cancer Outcomes: The Crucial Role of MMPs and Microenvironment

María Auxiliadora Olivares-Urbano, Carmen Griñán-Lisón, Sandra Ríos-Arrabal, Francisco Artacho-Cordón, Ana Isabel Torralbo, Elena López-Ruiz, Juan Antonio Marchal and María Isabel Núñez

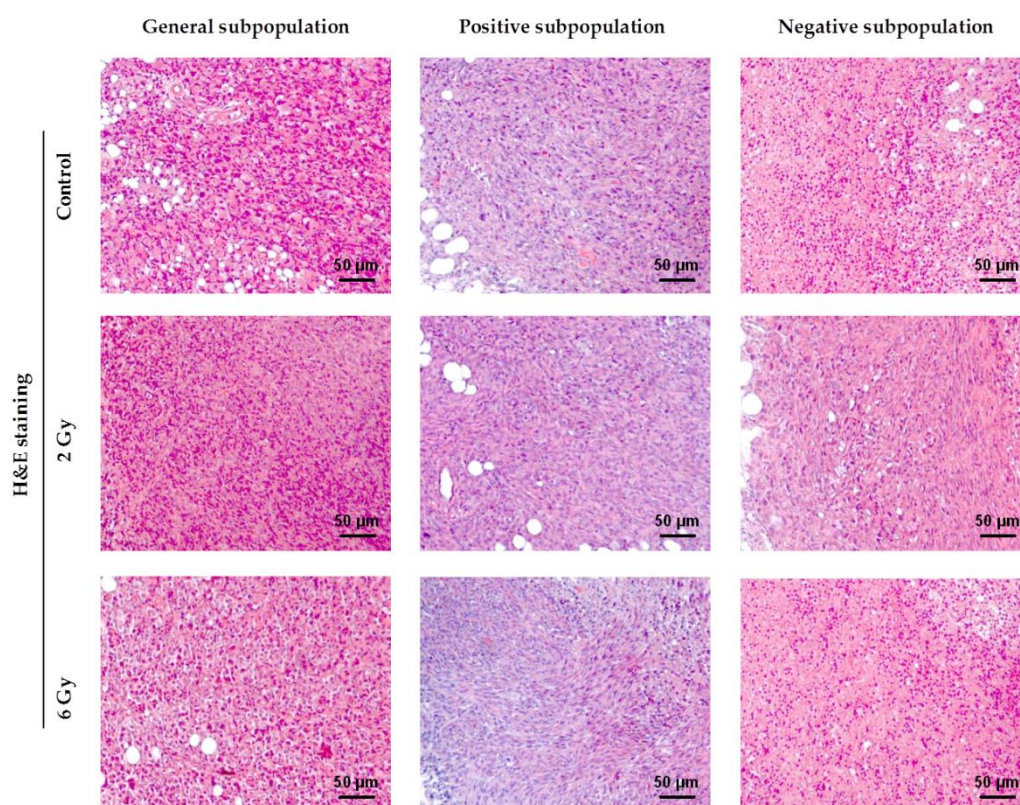

**Figure S1.** H&E staining of the tumors for all IR doses (0, 2 and 6 Gy) in the general, positive and negative cell subpopulations of the MDA-MB-231 cell line.

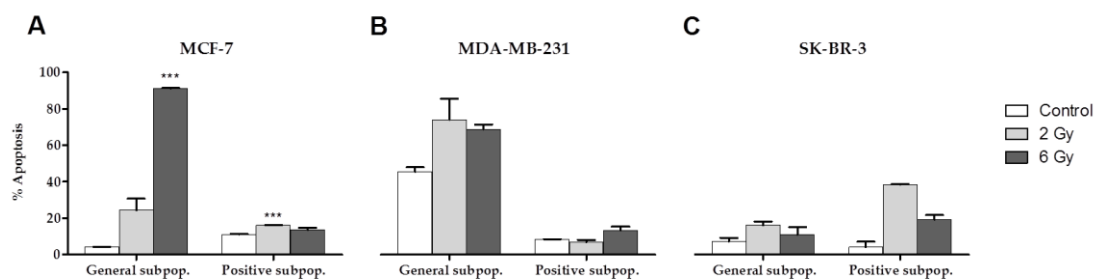

**Figure S2.** Values of apoptosis (%) at 0, 2 and 6 Gy IR doses measured 24 h after treatment in MCF-7 (A), MDA-MB-231 (B) and SK-BR-3 (C) cell lines in the general subpopulation and positive subpopulation cultures. Values are expressed as the mean  $\pm$  SEM (error bars) of three independent experiments. Mean value for each experiment was calculated by averaging the triplicates ( $n = 3$ ); \*\*\*  $p < 0.001$ .

**Table S1.** Expression values (fold change) of the genes detected in the 3D culture for all IR doses (0, 2 and 6 Gy) in the general, positive and negative cell subpopulations of the MCF-7, MDA-MB-231 and SK-BR-3 cell lines.

| Genes             | IR Dose | Expression Values (Fold Change) |                        |                        |
|-------------------|---------|---------------------------------|------------------------|------------------------|
|                   |         | General Subpopulation           | Positive Subpopulation | Negative Subpopulation |
| <b>MCF-7</b>      |         |                                 |                        |                        |
|                   | Control | 1.000                           | 1.000                  | 1.000                  |
| <i>TIMP-1</i>     | 2 Gy    | 1.378                           | 0.719                  | 0.961                  |
|                   | 6 Gy    | 0.793                           | 0.810                  | 1.129                  |
| <b>MDA-MB-231</b> |         |                                 |                        |                        |
|                   | Control | 1.000                           | 1.000                  | 1.000                  |
| <i>MMP-1</i>      | 2 Gy    | 0.819                           | 1.804                  | 2.197                  |
|                   | 6 Gy    | 0.898                           | 2.224                  | 1.146                  |
|                   | Control | 1.000                           | 1.000                  | 1.000                  |
| <i>MMP-3</i>      | 2 Gy    | 1.075                           | 1.130                  | 0.646                  |
|                   | 6 Gy    | 1.567                           | 1.202                  | 0.556                  |
|                   | Control | 1.000                           | 1.000                  | 1.000                  |
| <i>MMP-9</i>      | 2 Gy    | 0.570                           | 2.377                  | 0.774                  |
|                   | 6 Gy    | 0.655                           | 1.584                  | 0.675                  |
|                   | Control | 1.000                           | 1.000                  | 1.000                  |
| <i>MMP-13</i>     | 2 Gy    | 0.413                           | 1.286                  | 1.563                  |
|                   | 6 Gy    | 1.326                           | 1.960                  | 1.991                  |
|                   | Control | 1.000                           | 1.000                  | 1.000                  |
| <i>HDAC-1</i>     | 2 Gy    | 0.740                           | 1.234                  | 0.441                  |
|                   | 6 Gy    | 1.006                           | 0.751                  | 0.489                  |
|                   | Control | 1.000                           | 1.000                  | 1.000                  |
| <i>HDAC-2</i>     | 2 Gy    | 0.980                           | 1.256                  | 3.150                  |
|                   | 6 Gy    | 1.104                           | 0.772                  | 2.824                  |
|                   | Control | 1.000                           | 1.000                  | 1.000                  |
| <i>HDAC-4</i>     | 2 Gy    | 0.900                           | 1.131                  | 1.266                  |
|                   | 6 Gy    | 1.219                           | 0.950                  | 1.089                  |
|                   | Control | 1.000                           | 1.000                  | 1.000                  |
| <i>TIMP-1</i>     | 2 Gy    | 0.777                           | 1.048                  | 1.290                  |
|                   | 6 Gy    | 1.090                           | 0.991                  | 1.400                  |
|                   | Control | 1.000                           | 1.000                  | 1.000                  |
| <i>TIMP-2</i>     | 2 Gy    | 0.837                           | 1.254                  | 1.230                  |
|                   | 6 Gy    | 1.250                           | 1.280                  | 1.104                  |
| <b>SK-BR-3</b>    |         |                                 |                        |                        |
|                   | Control | 1.000                           | 1.000                  | 1.000                  |
| <i>MMP-1</i>      | 2 Gy    | 0.384                           | 0.822                  | 1.160                  |
|                   | 6 Gy    | 0.764                           | 0.538                  | 2.398                  |
|                   | Control | 1.000                           | 1.000                  | 1.000                  |
| <i>MMP-13</i>     | 2 Gy    | 1.521                           | 1.450                  | 1.443                  |
|                   | 6 Gy    | 1.537                           | 1.367                  | 1.351                  |
|                   | Control | 1.000                           | 1.000                  | 1.000                  |
| <i>HDAC-1</i>     | 2 Gy    | 0.578                           | 2.944                  | 1.097                  |
|                   | 6 Gy    | 0.838                           | 0.988                  | 4.041                  |
|                   | Control | 1.000                           | 1.000                  | 1.000                  |
| <i>HDAC-2</i>     | 2 Gy    | 0.342                           | 0.869                  | 2.051                  |
|                   | 6 Gy    | 0.754                           | 0.843                  | 1.330                  |
|                   | Control | 1.000                           | 1.000                  | 1.000                  |
| <i>HDAC-4</i>     | 2 Gy    | 0.730                           | 1.003                  | 1.221                  |
|                   | 6 Gy    | 1.035                           | 0.792                  | 0.924                  |
|                   | Control | 1.000                           | 1.000                  | 1.000                  |
| <i>TIMP-1</i>     | 2 Gy    | 1.030                           | 1.017                  | 1.141                  |
|                   | 6 Gy    | 1.480                           | 0.954                  | 1.272                  |
|                   | Control | 1.000                           | 1.000                  | 1.000                  |
| <i>TIMP-2</i>     | 2 Gy    | 0.235                           | 0.927                  | 1.692                  |
|                   | 6 Gy    | 0.238                           | 1.358                  | 1.271                  |

**Table S2.** Expression values (fold change) of the genes detected in the 3D + IrECM culture for all IR doses (0, 2 and 6 Gy) in the general, positive and negative cell subpopulations of the MCF-7, MDA-MB-231 and SK-BR-3 cell lines.

| Genes             | IR Dose | Expression Values (Fold Change) |                        |                        |
|-------------------|---------|---------------------------------|------------------------|------------------------|
|                   |         | General Subpopulation           | Positive Subpopulation | Negative Subpopulation |
| <b>MCF-7</b>      |         |                                 |                        |                        |
|                   | Control | 1.000                           | 1.000                  | 1.000                  |
| <i>TIMP-1</i>     | 2 Gy    | 2.331                           | 0.468                  | 1.006                  |
|                   | 6 Gy    | 0.886                           | 1.432                  | 1.167                  |
| <b>MDA-MB-231</b> |         |                                 |                        |                        |
|                   | Control | 1.000                           | 1.000                  | 1.000                  |
| <i>MMP-1</i>      | 2 Gy    | 1.276                           | 0.771                  | 0.224                  |
|                   | 6 Gy    | 1.346                           | 3.385                  | 0.455                  |
|                   | Control | 1.000                           | 1.000                  | 1.000                  |
| <i>MMP-3</i>      | 2 Gy    | 0.485                           | 0.653                  | 0.148                  |
|                   | 6 Gy    | 0.482                           | 1.906                  | 0.326                  |
|                   | Control | 1.000                           | 1.000                  | 1.000                  |
| <i>MMP-13</i>     | 2 Gy    | 1.058                           | 1.383                  | 0.631                  |
|                   | 6 Gy    | 0.632                           | 1.149                  | 3.123                  |
|                   | Control | 1.000                           | 1.000                  | 1.000                  |
| <i>HDAC-2</i>     | 2 Gy    | 8.690                           | 0.881                  | 0.845                  |
|                   | 6 Gy    | 4.539                           | 1.265                  | 1.007                  |
|                   | Control | 1.000                           | 1.000                  | 1.000                  |
| <i>HDAC-4</i>     | 2 Gy    | 0.903                           | 1.171                  | 1.311                  |
|                   | 6 Gy    | 0.733                           | 1.052                  | 2.307                  |
|                   | Control | 1.000                           | 1.000                  | 1.000                  |
| <i>TIMP-1</i>     | 2 Gy    | 1.015                           | 1.027                  | 1.478                  |
|                   | 6 Gy    | 0.818                           | 0.933                  | 1.850                  |
|                   | Control | 1.000                           | 1.000                  | 1.000                  |
| <i>TIMP-2</i>     | 2 Gy    | 0.448                           | 1.009                  | 1.066                  |
|                   | 6 Gy    | 0.615                           | 0.777                  | 1.446                  |
| <b>SK-BR-3</b>    |         |                                 |                        |                        |
|                   | Control | 1.000                           | 1.000                  | 1.000                  |
| <i>MMP-13</i>     | 2 Gy    | 0.908                           | 0.799                  | 1.257                  |
|                   | 6 Gy    | 0.523                           | 0.720                  | 1.446                  |
|                   | Control | 1.000                           | 1.000                  | 1.000                  |
| <i>HDAC-2</i>     | 2 Gy    | 0.961                           | 0.567                  | 0.852                  |
|                   | 6 Gy    | 0.722                           | 1.005                  | 2.920                  |
|                   | Control | 1.000                           | 1.000                  | 1.000                  |
| <i>HDAC-4</i>     | 2 Gy    | 1.120                           | 0.399                  | 0.558                  |
|                   | 6 Gy    | 0.598                           | 0.640                  | 0.840                  |
|                   | Control | 1.000                           | 1.000                  | 1.000                  |
| <i>TIMP-1</i>     | 2 Gy    | 1.121                           | 1.421                  | 2.329                  |
|                   | 6 Gy    | 1.034                           | 0.984                  | 2.203                  |
|                   | Control | 1.000                           | 1.000                  | 1.000                  |
| <i>TIMP-2</i>     | 2 Gy    | 1.111                           | 0.208                  | 0.772                  |
|                   | 6 Gy    | 0.823                           | 0.264                  | 0.680                  |

**Table S3.** Primer sequences used for the measurements of gene expression in qRT-PCR assays.

| <b>Genes</b>  | <b>Primer Sequences</b> |                        |
|---------------|-------------------------|------------------------|
| <b>18S</b>    | Forward                 | CGGCGACGACCCATTCGAAC   |
|               | Reverse                 | GAATCGAACCCCTGATTCCCCG |
| <b>GADPH</b>  | Forward                 | CACCAGGGCTGCTTTAACTC   |
|               | Reverse                 | CCTTGACGGTGCCATGGAATT  |
| <b>MMP-1</b>  | Forward                 | AAGGCCAGTATGCACAGCTT   |
|               | Reverse                 | TGCTTGACCCTCAGAGACCT   |
| <b>MMP-2</b>  | Forward                 | TTTCATTCCGCTCCAGGGC    |
|               | Reverse                 | TCGCACACCACATCTTCCGT   |
| <b>MMP-3</b>  | Forward                 | GGCTTCCCAAGCAAATAGC    |
|               | Reverse                 | GTGCCATATTGTGCCTTCT    |
| <b>MMP-9</b>  | Forward                 | CCTGCCAGTTTCCATTTCATC  |
|               | Reverse                 | GCCATTCACGTCGTCCTTAT   |
| <b>MMP-13</b> | Forward                 | AACATCCAAAAACGCCAGAC   |
|               | Reverse                 | GGAAGTTCTGGCCAAAATGA   |
| <b>TIMP-1</b> | Forward                 | ACCAGACCACCTTATACCA    |
|               | Reverse                 | CATTCCTCACAGCCAACA     |
| <b>TIMP-2</b> | Forward                 | TGCTTCTTGCCTGTCTG      |
|               | Reverse                 | CTGGACTTCTTACTATGCTTA  |
| <b>HDAC-1</b> | Forward                 | AAGACGACCCTGACAAGC     |
|               | Reverse                 | AGACCTGGCACCCTTAT      |
| <b>HDAC-2</b> | Forward                 | GGTAACTCCTGCTACTAAGAT  |
|               | Reverse                 | GGTGCTATTGTGAATGTCTG   |
| <b>HDAC-4</b> | Forward                 | ACCTACCTGATGCCTGTT     |
|               | Reverse                 | AACCTCCAACCTCCACTGA    |

**Table S4.** Values of tumor volume (mm<sup>3</sup>) corresponding to monitoring of tumor growth after orthotopic inoculation in Matrigel of the general, positive and negative cell subpopulations of the MDA-MB-231 cell line at 0, 2 and 6 Gy.

| <b>Days</b> | <b>IR Dose</b> | <b>Tumor Volume (mm<sup>3</sup>)</b> |                               |                               |
|-------------|----------------|--------------------------------------|-------------------------------|-------------------------------|
|             |                | <b>General Subpopulation</b>         | <b>Positive Subpopulation</b> | <b>Negative Subpopulation</b> |
| <b>7</b>    | Control        | 0.000                                | 0.000                         | 0.000                         |
|             | 2 Gy           | 0.000                                | 0.000                         | 0.000                         |
|             | 6 Gy           | 0.000                                | 0.000000                      | 0.000                         |
| <b>14</b>   | Control        | 0.000                                | 0.000                         | 0.000                         |
|             | 2 Gy           | 2.339                                | 0.936                         | 0.000                         |
|             | 6 Gy           | 0.000                                | 1.872                         | 0.000                         |
| <b>21</b>   | Control        | 0.000                                | 2.495                         | 0.000                         |
|             | 2 Gy           | 7.798                                | 1.872                         | 0.000                         |
|             | 6 Gy           | 0.000                                | 2.495                         | 0.000                         |
| <b>28</b>   | Control        | 7.486                                | 6.238                         | 8.110                         |
|             | 2 Gy           | 10.92                                | 2.495                         | 3.119                         |
|             | 6 Gy           | 0.000                                | 4.387                         | 1.248                         |
| <b>35</b>   | Control        | 7.486                                | 6.238                         | 8.110                         |
|             | 2 Gy           | 10.92                                | 5.010                         | 6.238                         |
|             | 6 Gy           | 2.495                                | 8.842                         | 2.495                         |
| <b>42</b>   | Control        | 7.486                                | 6.238                         | 8.110                         |
|             | 2 Gy           | 10.92                                | 5.010                         | 11.22                         |
|             | 6 Gy           | 4.991                                | 10.89                         | 6.238                         |
| <b>49</b>   | Control        | 9.982                                | 9.982                         | 8.110                         |
|             | 2 Gy           | 10.92                                | 5.010                         | 12.48                         |
|             | 6 Gy           | 4.991                                | 11.02                         | 7.486                         |

|     |         |        |        |        |
|-----|---------|--------|--------|--------|
| 56  | Control | 9.982  | 9.982  | 11.85  |
|     | 2 Gy    | 10.92  | 7.468  | 14.41  |
|     | 6 Gy    | 4.991  | 17.70  | 10.00  |
| 63  | Control | 9.982  | 10.63  | 13.76  |
|     | 2 Gy    | 14.14  | 11.49  | 20.20  |
|     | 6 Gy    | 4.991  | 20.73  | 14.16  |
| 70  | Control | 13.76  | 10.92  | 15.05  |
|     | 2 Gy    | 18.96  | 16.36  | 20.20  |
|     | 6 Gy    | 4.99   | 30.36  | 19.32  |
| 77  | Control | 15.05  | 14.11  | 22.77  |
|     | 2 Gy    | 20.57  | 35.05  | 45.88  |
|     | 6 Gy    | 4.991  | 30.36  | 32.080 |
| 84  | Control | 17.63  | 22.86  | 33.44  |
|     | 2 Gy    | 58.77  | 35.95  | 58.92  |
|     | 6 Gy    | 4.991  | 31.33  | 75.79  |
| 91  | Control | 20.81  | 40.88  | 57.40  |
|     | 2 Gy    | 287.3  | 43.89  | 104.2  |
|     | 6 Gy    | 7.486  | 44.308 | 93.70  |
| 98  | Control | 69.46  | 76.85  | 63.91  |
|     | 2 Gy    | 313.3  | 208.0  | 118.0  |
|     | 6 Gy    | 19.44  | 97.76  | 96.27  |
| 105 | Control | 110.1  | 90.14  | 118.3  |
|     | 2 Gy    | 348.7  | 208.0  | 126.6  |
|     | 6 Gy    | 72.96  | 106.9  | 96.27  |
| 112 | Control | 245.66 | 146.9  | 174.0  |
|     | 2 Gy    | 368.96 | 256.1  | 149.8  |
|     | 6 Gy    | 126.1  | 209.5  | 110.9  |
| 119 | Control | 408.1  | 268.4  | 217.5  |
|     | 2 Gy    | 413.2  | 279.0  | 194.4  |
|     | 6 Gy    | 314.0  | 221.3  | 159.2  |

**Table S5.** *p* values of tumor volume when comparing the doses of 2 and 6 Gy with the control within each cell subpopulation.

| Days | <i>p</i> Values       |                  |                        |                  |                        |                  |
|------|-----------------------|------------------|------------------------|------------------|------------------------|------------------|
|      | General Subpopulation |                  | Positive Subpopulation |                  | Negative Subpopulation |                  |
|      | 2 Gy vs. Control      | 6 Gy vs. Control | 2 Gy vs. Control       | 6 Gy vs. Control | 2 Gy vs. Control       | 6 Gy vs. Control |
| 7    | 1.000                 | 1.000            | 1.000                  | 1.000            | 1.000                  | 1.000            |
| 14   | 0.180                 | 1.000            | 0.317                  | 0.317            | 1.000                  | 1.000            |
| 21   | 0.059                 | 1.000            | 0.655                  | 1.000            | 1.000                  | 1.000            |
| 28   | 0.414                 | 0.063            | 0.180                  | 0.715            | 0.038                  | 0.042            |
| 35   | 0.414                 | 0.194            | 0.655                  | 0.500            | 0.180                  | 0.066            |
| 42   | 0.414                 | 0.581            | 0.655                  | 0.593            | 0.180                  | 0.180            |
| 49   | 0.655                 | 0.317            | 0.141                  | 1.000            | 0.102                  | 0.317            |
| 56   | 0.655                 | 0.317            | 0.500                  | 0.593            | 0.109                  | 0.180            |
| 63   | 0.141                 | 0.317            | 0.892                  | 1.000            | 0.102                  | 0.317            |
| 70   | 0.276                 | 0.102            | 0.892                  | 1.000            | 0.102                  | 0.593            |
| 77   | 0.269                 | 0.102            | 0.892                  | 0.686            | 0.144                  | 0.686            |
| 84   | 0.144                 | 0.102            | 1.000                  | 0.500            | 0.225                  | 0.225            |
| 91   | 0.068                 | 0.068            | 0.715                  | 0.500            | 0.225                  | 0.225            |
| 98   | 0.144                 | 0.138            | 0.080                  | 0.500            | 0.225                  | 0.345            |
| 105  | 0.144                 | 0.500            | 0.080                  | 0.500            | 0.893                  | 0.686            |
| 112  | 0.465                 | 0.043            | 0.043                  | 0.500            | 0.686                  | 0.225            |
| 119  | 0.715                 | 0.080            | 0.893                  | 0.500            | 0.686                  | 0.225            |

**Table S6.** *p* values of tumor volume when comparing the positive and negative subpopulations with the general subpopulations.

| Days | IR Dose | <i>p</i> Values                      |                                      |
|------|---------|--------------------------------------|--------------------------------------|
|      |         | Positive Subpop. vs. General Subpop. | Negative Subpop. vs. General Subpop. |
| 7    | Control | 1.000                                | 1.000                                |
|      | 2 Gy    | 1.000                                | 1.000                                |
|      | 6 Gy    | 1.000                                | 1.000                                |
| 14   | Control | 1.000                                | 1.000                                |
|      | 2 Gy    | 0.383                                | 0.094                                |
|      | 6 Gy    | 0.317                                | 1.000                                |
| 21   | Control | 0.136                                | 1.000                                |
|      | 2 Gy    | 0.068                                | 0.006                                |
|      | 6 Gy    | 0.136                                | 1.000                                |
| 28   | Control | 0.746                                | 0.911                                |
|      | 2 Gy    | 0.022                                | 0.022                                |
|      | 6 Gy    | 0.136                                | 0.134                                |
| 35   | Control | 0.746                                | 0.911                                |
|      | 2 Gy    | 0.205                                | 0.223                                |
|      | 6 Gy    | 0.190                                | 1.000                                |
| 42   | Control | 0.746                                | 0.911                                |
|      | 2 Gy    | 0.205                                | 0.866                                |
|      | 6 Gy    | 0.265                                | 0.729                                |
| 49   | Control | 0.204                                | 0.408                                |
|      | 2 Gy    | 0.205                                | 0.264                                |
|      | 6 Gy    | 0.265                                | 0.502                                |
| 56   | Control | 0.204                                | 0.881                                |
|      | 2 Gy    | 0.258                                | 0.109                                |
|      | 6 Gy    | 0.156                                | 0.326                                |
| 63   | Control | 0.435                                | 0.180                                |
|      | 2 Gy    | 0.451                                | 0.203                                |
|      | 6 Gy    | 0.156                                | 0.042                                |
| 70   | Control | 0.063                                | 0.513                                |
|      | 2 Gy    | 0.211                                | 1.000                                |
|      | 6 Gy    | 0.156                                | 0.032                                |
| 77   | Control | 0.331                                | 0.045                                |
|      | 2 Gy    | 0.133                                | 0.213                                |
|      | 6 Gy    | 0.156                                | 0.022                                |
| 84   | Control | 0.827                                | 0.042                                |
|      | 2 Gy    | 0.135                                | 1.000                                |
|      | 6 Gy    | 0.108                                | 0.022                                |
| 91   | Control | 1.000                                | 0.073                                |
|      | 2 Gy    | 0.025                                | 0.086                                |
|      | 6 Gy    | 0.280                                | 0.008                                |
| 98   | Control | 0.196                                | 0.916                                |
|      | 2 Gy    | 0.327                                | 0.086                                |
|      | 6 Gy    | 0.169                                | 0.026                                |
| 105  | Control | 0.341                                | 0.751                                |
|      | 2 Gy    | 0.221                                | 0.086                                |
|      | 6 Gy    | 0.754                                | 0.463                                |
| 112  | Control | 0.175                                | 0.347                                |
|      | 2 Gy    | 0.221                                | 0.027                                |
|      | 6 Gy    | 0.347                                | 0.917                                |
| 119  | Control | 0.347                                | 0.175                                |
|      | 2 Gy    | 0.221                                | 0.014                                |
|      | 6 Gy    | 0.754                                | 0.347                                |

**Table S7.** Values of MMP-1 positive staining (% tumor area) corresponding to IHC staining of the tumors from the different conditions studied (IR doses and cell subpopulations).

| Subpopulation | MMP-1 Positive Staining (% Tumor Area) |       |       |
|---------------|----------------------------------------|-------|-------|
|               | Control                                | 2 Gy  | 6 Gy  |
| General       | 42.42                                  | 43.30 | 36.66 |
| Positive      | 34.09                                  | 35.01 | 30.78 |
| Negative      | 30.04                                  | 28.36 | 24.26 |

**Table S8.** Values of apoptosis (%) of the MCF-7 (A), MDA-MB-231 (B) and SK-BR-3 (C) cell lines in the general subpopulation and positive subpopulation cultures at 0, 2 and 6 Gy IR doses.

| IR Dose           | Apoptosis Values (%)  |                        |
|-------------------|-----------------------|------------------------|
|                   | General Subpopulation | Positive Subpopulation |
| <b>MCF-7</b>      |                       |                        |
| Control           | 4.250                 | 11.15                  |
| 2 Gy              | 24.40                 | 16.16                  |
| 6 Gy              | 91.25                 | 13.65                  |
| <b>MDA-MB-231</b> |                       |                        |
| Control           | 45.50                 | 8.400                  |
| 2 Gy              | 74.05                 | 6.950                  |
| 6 Gy              | 68.85                 | 13.40                  |
| <b>SK-BR-3</b>    |                       |                        |
| Control           | 7.150                 | 4.150                  |
| 2 Gy              | 16.10                 | 38.45                  |
| 6 Gy              | 11.15                 | 19.25                  |

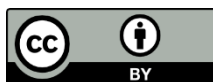

© 2019 by the authors. Licensee MDPI, Basel, Switzerland. This article is an open access article distributed under the terms and conditions of the Creative Commons Attribution (CC BY) license (<http://creativecommons.org/licenses/by/4.0/>).
